# Supplementary material for: Transition metal triflate catalyzed conversion of alcohols, ethers and esters to olefins
Source: Royal Society of Chemistry journal article supplement (doi:10.1039/c8ra02437e), 2018-01-01
Supplement: c8ra02437e1.pdf [file c8ra02437e1.pdf]

# Transition metal triflate catalysed conversion of alcohols and ethers to olefins

J. Keskiaväli, A. Parviainen, Kalle Lagerblom and T.Repo\*

## Materials

### Catalysts

Fe(OTf)<sub>3</sub> (Alfa Aesar, 90%), FeCl<sub>3</sub> (Merck, >98%), Fe(NO<sub>3</sub>)<sub>3</sub>•9H<sub>2</sub>O (Sigma Aldrich ≥99.95%), Fe(CO<sub>2</sub>CH<sub>3</sub>)<sub>3</sub> (Riedel de Haen), Fe<sub>2</sub>(SO<sub>4</sub>)<sub>3</sub>•xH<sub>2</sub>O (97%, Sigma Aldrich), Hf(OTf)<sub>4</sub> (Alfa Aesar, 98%), Eu(OTf)<sub>3</sub> (Alfa Aesar, 98%), Sc(OTf)<sub>3</sub> (Alfa Aesar, 98%), Yb(OTf)<sub>3</sub> (Sigma Aldrich, 99.99%), Y(OTf)<sub>3</sub> (Alfa Aesar, 99%), La(OTf)<sub>3</sub> (Sigma Aldrich 99.999%), Nd(OTf)<sub>3</sub> (Sigma Aldrich, 98%), Al(OTf)<sub>3</sub> (Alfa Aesar, 99%), Mg(OTf)<sub>2</sub> (Alfa Aesar, 98%) and Pr(OTf)<sub>3</sub> (Sigma Aldrich, 98%).

### Substrates

2-octanol (Sigma Aldrich, 97%), 1-octanol (Merck, 97%), 3-ethylpentan-3-ol (Alfa Aesar, 97%), cyclohexanol (Merck, 95%), 1-phenylpropan-1-ol (Fluka Analytical, ≥97%), 3-phenylpropan-1-ol (Sigma Aldrich, ≥98%), diethylene glycol (Sigma Aldrich), DL-menthol (Alfa Aesar, 98+%), dihydromyrcenol (Sigma Aldrich, 99%), α-terpineol (Alfa Aesar, 96%), linalool (Alfa Aesar, 97%), β-citronellol (Sigma Aldrich, 95%), sorbitol (Sigma Aldrich, 98%), tea-tree oil (Ateol, Australian tea tree oil), dioctyl ether (Sigma Aldrich 99%) and octyl acetate (Alfa Aesar, 98+%).

### Standards

1-octene (Alfa Aesar, 97+%) and trans-2-octene (Alfa Aesar, 97%).

## Formation of alkenes via dehydration

**Table S1:** Tabulated values of metal cations and their catalytic activity in the dehydration of 2-octanol (solvent-free conditions, 3 h, 150 °C) as triflate salts.

| Metal           | Z (charge) | Effective ionic radius, r (pm) <sup>1</sup> | M-O dissociation energy (kJ/mol) <sup>2</sup> | Calculated Lewis acidity (*10 <sup>-6</sup> ) <sup>a</sup> | Yield (%) | Conversion (%) | Selectivity (%) |
|-----------------|------------|---------------------------------------------|-----------------------------------------------|------------------------------------------------------------|-----------|----------------|-----------------|
| Fe              | +3         | 64.5                                        | 409                                           | 11.18000791                                                | 30        | 48             | 63              |
| Hf              | +4         | 71                                          | 791                                           | 11.17596274                                                | 93        | >99            | 93              |
| Eu              | +3         | 94.7                                        | 557                                           | 3.532411726                                                | 2         | 9              | 22              |
| Sc              | +3         | 74.5                                        | 674                                           | 7.255250912                                                | 6         | 20             | 30              |
| Yb              | +3         | 86.8                                        | 398                                           | 4.587352139                                                | 1         | 8              | 13              |
| Y               | +3         | 90                                          | 715                                           | 4.115226337                                                | 1         | 5              | 20              |
| La              | +3         | 103.2                                       | 799                                           | 2.729494119                                                | 5         | 11             | 45              |
| Nd              | +3         | 98.3                                        | 703                                           | 3.15835324                                                 | 2         | 10             | 20              |
| Al              | +3         | 53.5                                        | 512                                           | 19.59114905                                                | 34        | 75             | 45              |
| Mg              | +2         | 72                                          | 394                                           | 5.358367627                                                | 4         | 10             | 40              |
| Pr              | +3         | 99                                          | 753                                           | 3.091830456                                                | 1         | 10             | 1               |
| Ti              | +4         | 60.5                                        | 662                                           | 18.06316576                                                | 71        | >99            | 71              |
| Cr              | +3         | 61.5                                        | 427                                           | 12.89721404                                                | 35        | 73             | 48              |
| Fe <sup>b</sup> | +3         | 64.5                                        | 409                                           | 11.18000791                                                | 80        | >99            | 80              |
| Sc <sup>b</sup> | +3         | 74.5                                        | 674                                           | 7.255250912                                                | 27        | 57             | 47              |
| Al <sup>b</sup> | +3         | 53.5                                        | 512                                           | 19.59114905                                                | 85        | >99            | 85              |
| Cr <sup>b</sup> | +3         | 61.5                                        | 427                                           | 12.89721404                                                | 84        | >99            | 84              |

<sup>a</sup> Lewis acidity calculated using equation  $L-A=Z/r^3$ , r= the effective radius in pm; <sup>b</sup> Reactions conducted at 165 °C

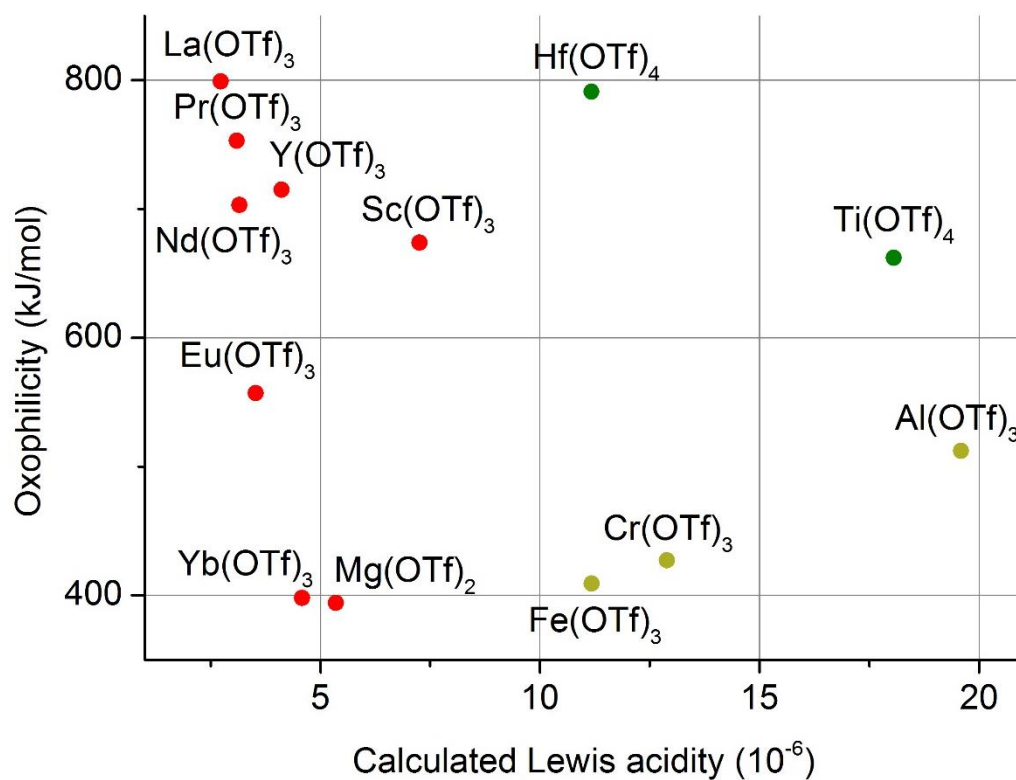

**Figure S1:** Mapped oxophilicity and calculated Lewis acidity values of different metal ions.

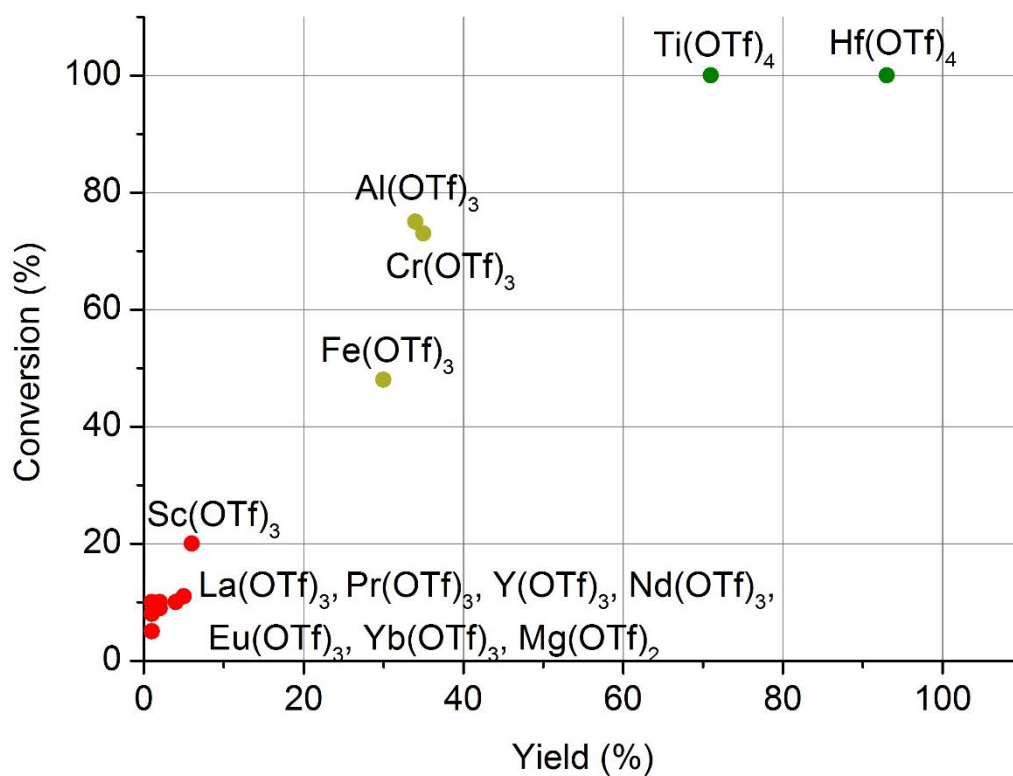

**Figure S2:** The reaction outcomes using different metal triflates (0.5 mol%) in the dehydration of 2-octanol (3 h, 150 °C).

### Synthesis of Ti(OTf)<sub>4</sub>

The Ti(OTf)<sub>4</sub> synthesis followed mainly previously reported synthesis procedure for Hf(OTf)<sub>4</sub>.<sup>3</sup> Initially, 36.1 mmol of triflic acid (98%, Sigma Aldrich) was placed into a 25 ml Schlenk tube under argon atmosphere. To this flask 9.1 mmol of TiCl<sub>4</sub> (99%, Sigma Aldrich) was added dropwise under constant argon flushing. The resulting yellow solution and precipitation was mixed for 3 hours. After the mixing 10 ml of water was added under constant argon flushing forming clear solution. The water was then evaporated *in vacuo*. The clear oily product was then heated at 180 °C for 3 hours under vacuum, forming white porous solid Ti(OTf)<sub>4</sub> in 51% yield (m=3.002 g).

### Synthesis of Cr(OTf)<sub>3</sub>

Similarly, Cr(OTf)<sub>3</sub> was prepared by placing 9.48 mmol of triflic acid (98%, Sigma Aldrich) into a 25 ml Schlenk tube under argon atmosphere, followed by the addition of 3.16 mmol of CrCl<sub>3</sub>•6H<sub>2</sub>O (96%, Sigma Aldrich) under constant argon flushing. The resulting solution and precipitation was mixed for 3 hours. After the mixing, 10 ml of water was added under constant argon flushing forming clear solution. The water was then evaporated *in vacuo*. The clear oily product was then heated at 180 °C for 3 hours under vacuum, forming green porous solid Cr(OTf)<sub>3</sub> in 81% yield (m=1.282 g).

### Synthesis of cyclohexene from cyclohexanol

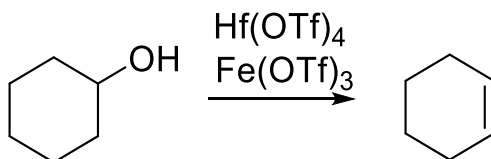

19.2 mmol of cyclohexanol (95%, Merck, used without purification, contained cyclohexanone) and 0.5 mol% of Hf(OTf)<sub>4</sub> (98%, Alfa Aesar) or Fe(OTf)<sub>3</sub> (90% Tech., Alfa Aesar) were placed into a 5 ml round bottom flask. The flask was connected to micro distillation apparatus. The reaction mixture was heated at 150 °C for 3.5 hours with Hf(OTf)<sub>4</sub> (165 °C, 2.5 h with Fe(OTf)<sub>3</sub>). The formed cyclohexene was distilled (75-80 °C during the reaction) and collected to cooled (0 °C) flask to avoid evaporation of the product. The cyclohexene containing flask was cooled in freezer (-20 °C) to separate the evaporated water (side product of the reaction) from cyclohexene. Cyclohexene was obtained in 78% (Hf(OTf)<sub>4</sub>) and 80% (Fe(OTf)<sub>3</sub>) yields. The sole product was analyzed with <sup>1</sup>H and <sup>13</sup>C NMR (Figures S3 & S4).

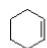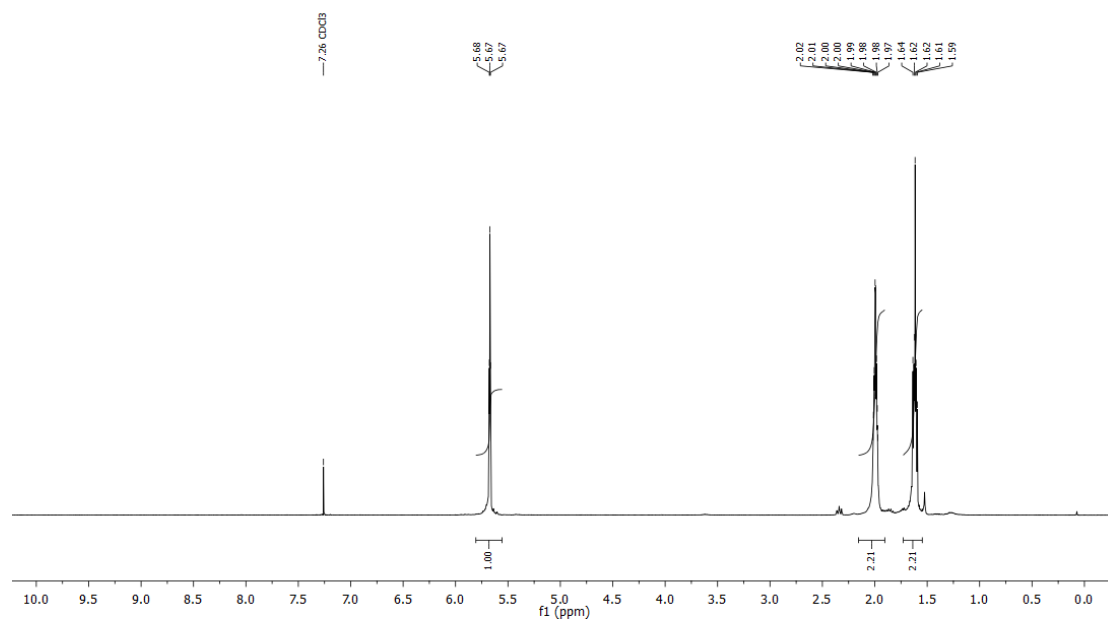

**Figure S3:**  $^1\text{H}$  NMR (300 MHz,  $\text{CDCl}_3$ ) spectrum of cyclohexene:  $\delta$  1.59-1.64 (m, 4H), 1.97-2.02 (m, 4H), 5.67-5.68 (t,  $J=1.5$  Hz, 2H) ppm.

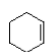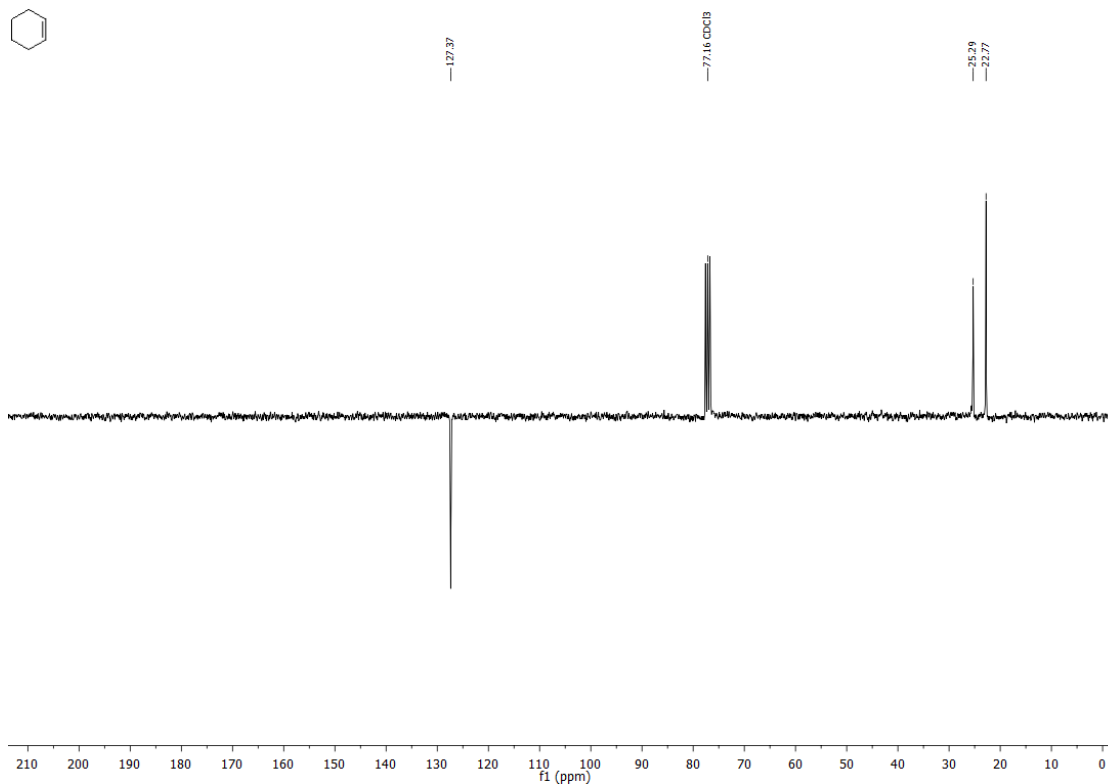

**Figure S4:**  $^{13}\text{C}$  NMR (75 MHz,  $\text{CDCl}_3$ ) spectrum of cyclohexene:  $\delta$  22.77, 25.29, 127.37 ppm.

## Synthesis of octenes from 2-octanol

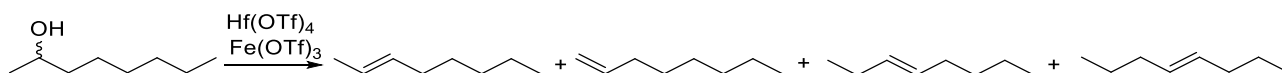

12.6 mmol (2 ml) of ( $\pm$ )-2-octanol (97% Sigma Aldrich, used without purification) and 0.5 mol% of  $\text{Hf}(\text{OTf})_4$  (98%, Alfa Aesar) or  $\text{Fe}(\text{OTf})_3$  (90% Tech., Alfa Aesar) were placed into a 5 ml round bottom flask. The flask was connected to micro distillation apparatus. The reaction mixture was heated at 150 °C for 1.5 hours with  $\text{Hf}(\text{OTf})_4$  (165 °C, 3 h with  $\text{Fe}(\text{OTf})_3$ ). The formed octenes were distilled (110-115 °C during the reaction) and collected to cooled (0 °C) flask to avoid evaporation of the product. The octene containing flask was cooled in freezer (-20 °C) to freeze the evaporated water (side product of the reaction) for easier separation from octenes. The products, 1-, 2-, 3- and 4-octenes (containing both E and Z isomers), were identified with GC-MS,  $^1\text{H}$  and  $^{13}\text{C}$  NMR (Figures S5 & S6). Octenes were obtained in 85% ( $\text{Hf}(\text{OTf})_4$ ) and 91% ( $\text{Fe}(\text{OTf})_3$ ) yields, with (2-, 3-, 4-octene:1-octene) ratio of 10:1.

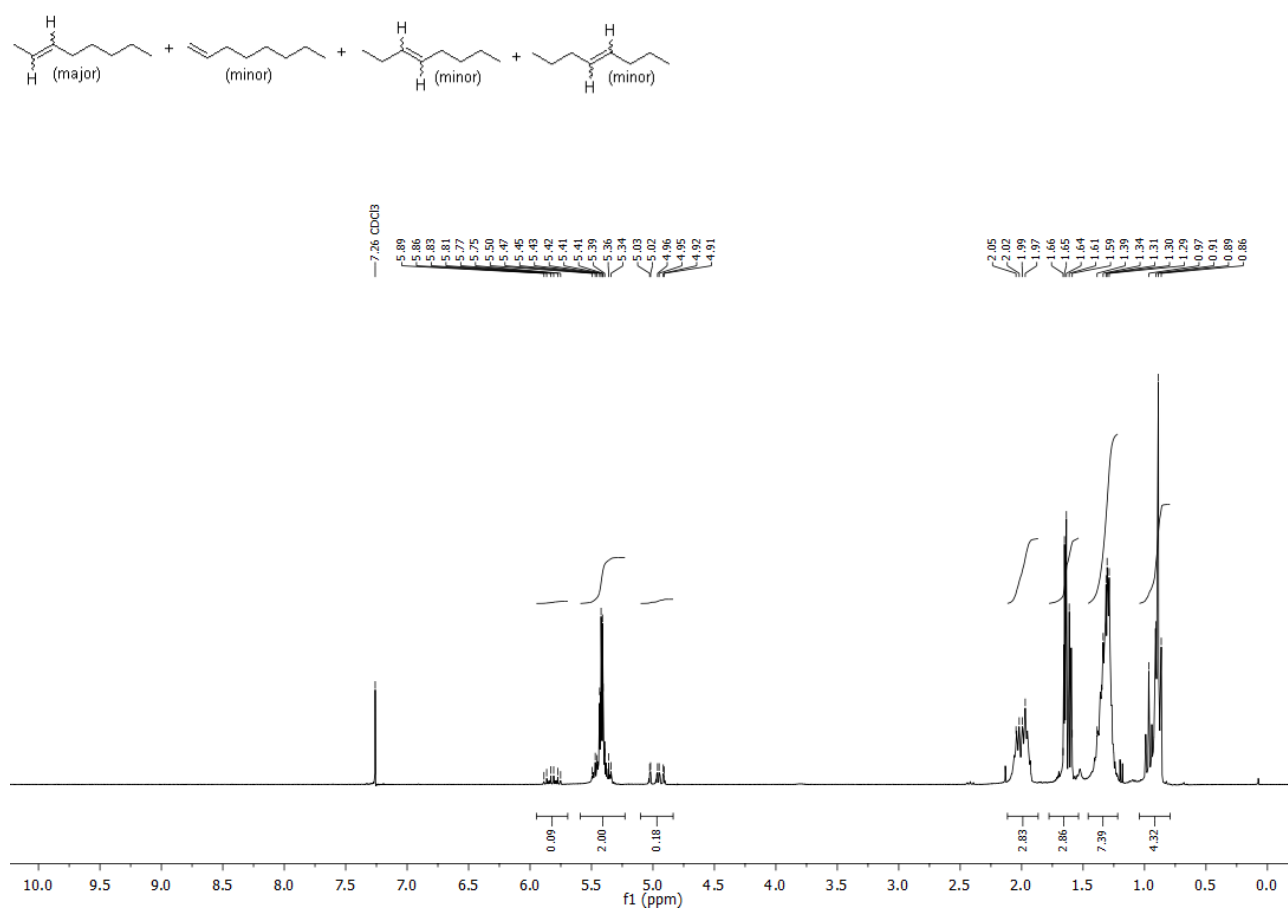

**Figure S5:**  $^1\text{H}$  NMR (300 MHz,  $\text{CDCl}_3$ ) spectrum of mixture of 1-, 2-, 3- and 4-octenes.

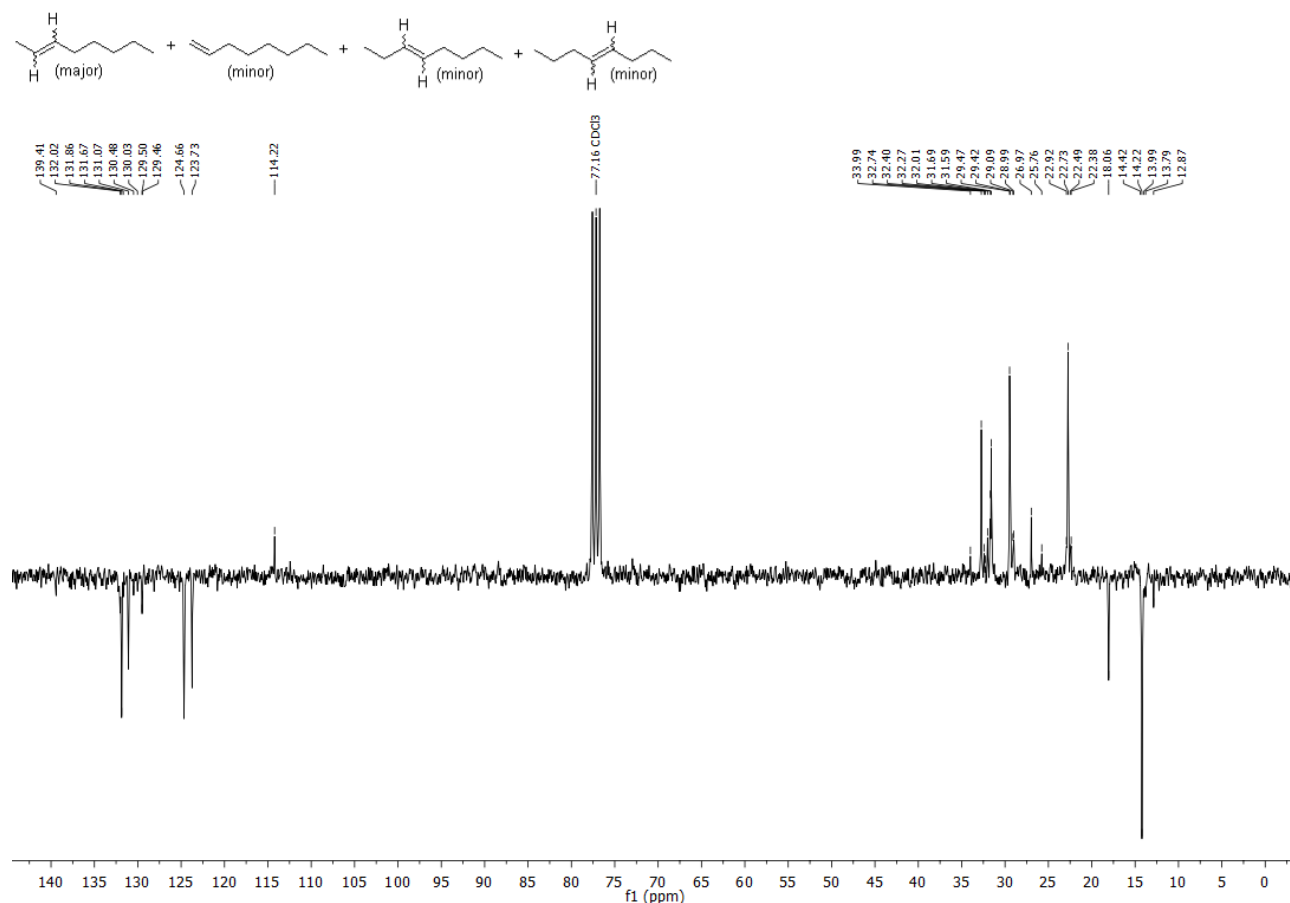

**Figure S6:**  $^{13}\text{C}$  NMR (75 MHz,  $\text{CDCl}_3$ ) spectrum of mixture of 1-, 2-, 3- and 4-octenes.

## Synthesis of octenes from 1-octanol

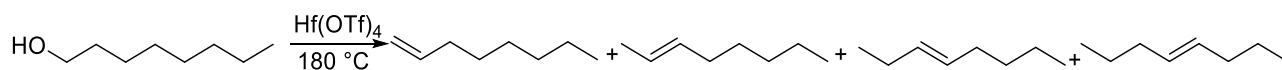

12.6 mmol (2 ml) of 1-octanol (97% Merck, used without purification) and 0.5 mol% of  $\text{Hf(OTf)}_4$  (98%, Alfa Aesar) or  $\text{Fe(OTf)}_3$  (90% Tech., Alfa Aesar) were placed into a 5 ml round bottom flask. The flask was connected to micro distillation apparatus. The reaction mixture was heated at 180 °C for 12 hours (180 °C, 6 h with or  $\text{Fe(OTf)}_3$ ). The formed octenes were distilled (110-115 °C during the reaction) and collected to cooled (0 °C) flask to avoid evaporation of the product. The octene containing flask was cooled in freezer (-20 °C) to separate the evaporated water (side product of the reaction) from the products. The products, 1-, 2-, 3- and 4-octenes (containing both E and Z isomers), were identified with GC-MS,  $^1\text{H}$  and  $^{13}\text{C}$  NMR (Figures S7 & S8). Octenes were obtained in 65% ( $\text{Hf(OTf)}_4$ ) and 2% ( $\text{Fe(OTf)}_3$ ) yields, with (2-, 3-, 4-octene:1-octene) ratio of 30:1.

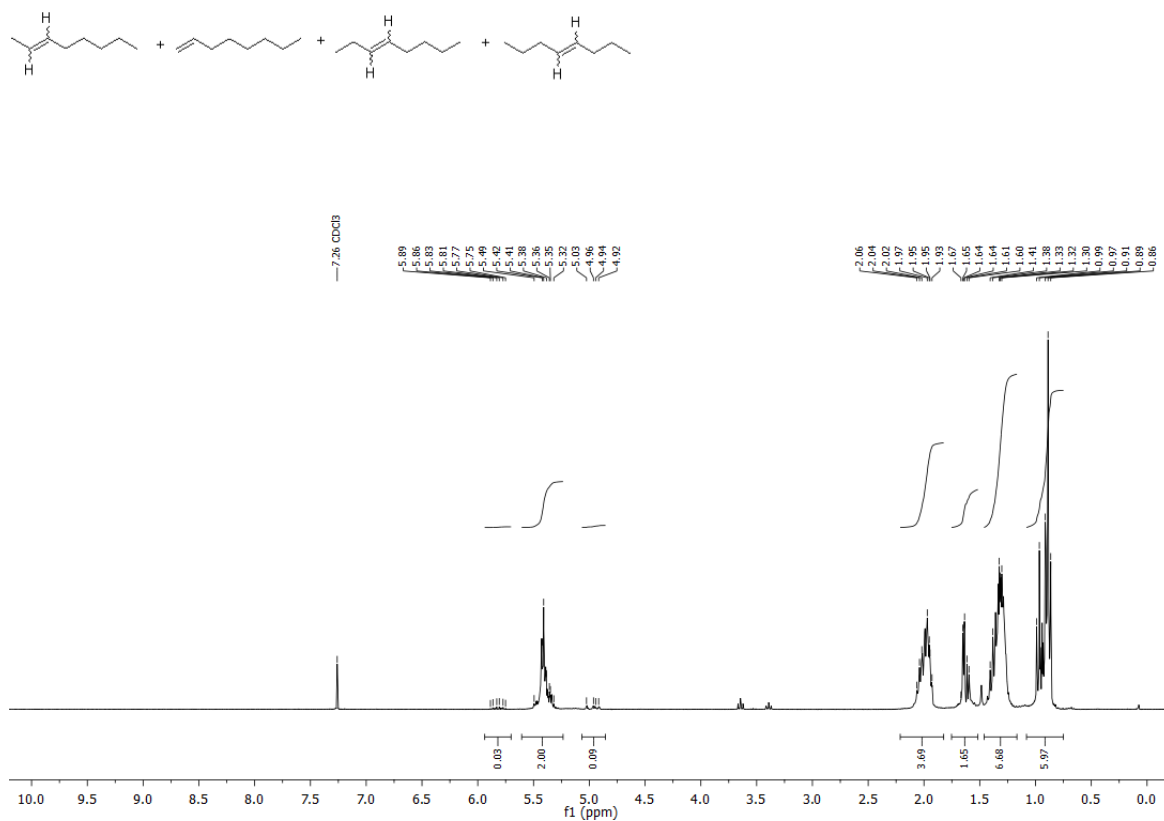

**Figure S7:**  $^1\text{H}$  NMR (300 MHz,  $\text{CDCl}_3$ ) spectrum of mixture of 1-, 2-, 3- and 4-octenes.

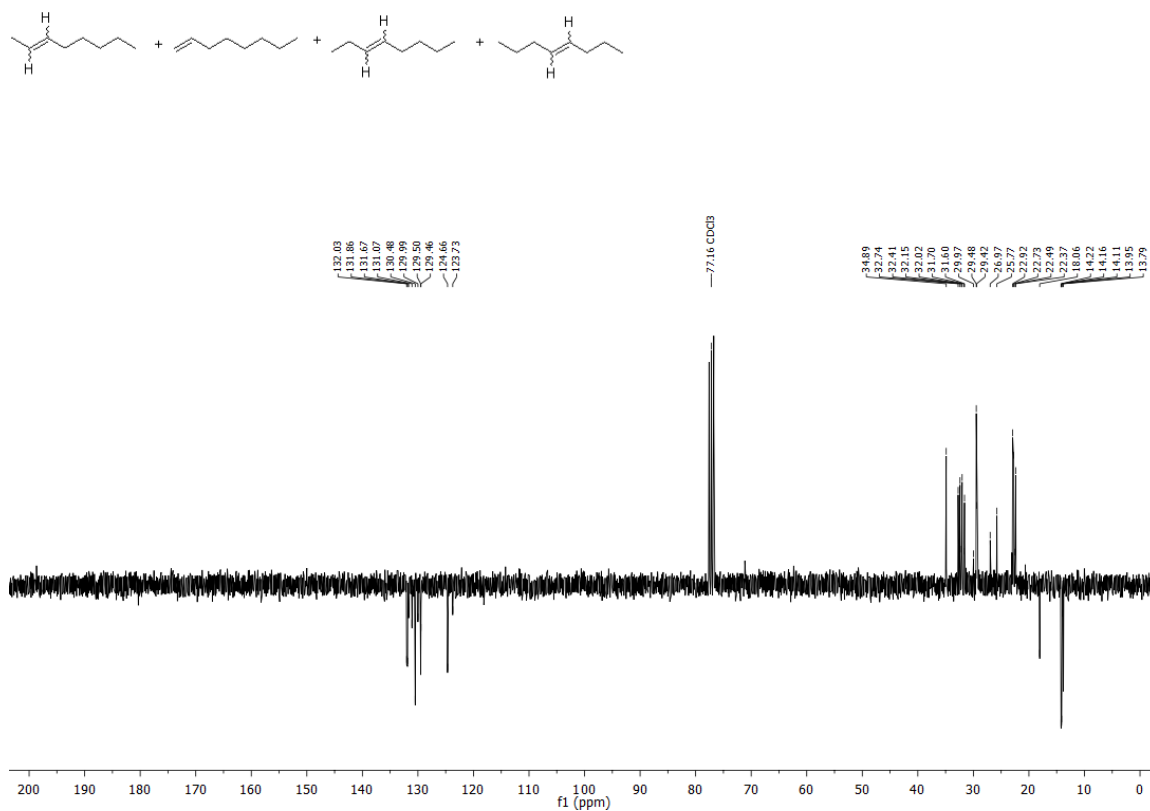

**Figure S8:**  $^{13}\text{C}$  NMR (75 MHz,  $\text{CDCl}_3$ ) spectrum of mixture of 1-, 2-, 3- and 4-octenes.



## Synthesis of 3-ethyl-pent-2-ene from 3-ethyl-3-pentanol

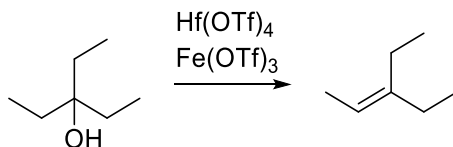

14.6 mmol (2 ml) of 3-ethyl-3-pentanol (97%, Alfa Aesar) and 0.5 mol% of Hf(OTf)<sub>4</sub> (98%, Alfa Aesar) or Fe(OTf)<sub>3</sub> (90% Tech., Alfa Aesar) was placed into a 5 ml round bottom flask. The flask was connected to micro distillation apparatus. The reaction mixture was heated at 110 °C (Hf(OTf)<sub>4</sub>) and 130 °C (Fe(OTf)<sub>3</sub>) for half an hour (as long as substrate was left in the heated flask). The formed 3-ethyl-pent-2-ene was distilled (80-84 °C during the reaction) and collected to cooled (0 °C) flask to avoid evaporation of the product. The product containing flask was cooled in freezer (-20 °C) to separate the evaporated water (side product of the reaction) from the products. The sole product, 3-ethyl-pent-2-ene, was obtained in the yields of 84% (Hf(OTf)<sub>4</sub>) and 79% (Fe(OTf)<sub>3</sub>). The product was analyzed with <sup>1</sup>H and <sup>13</sup>C NMR (Figures S9 & S10).

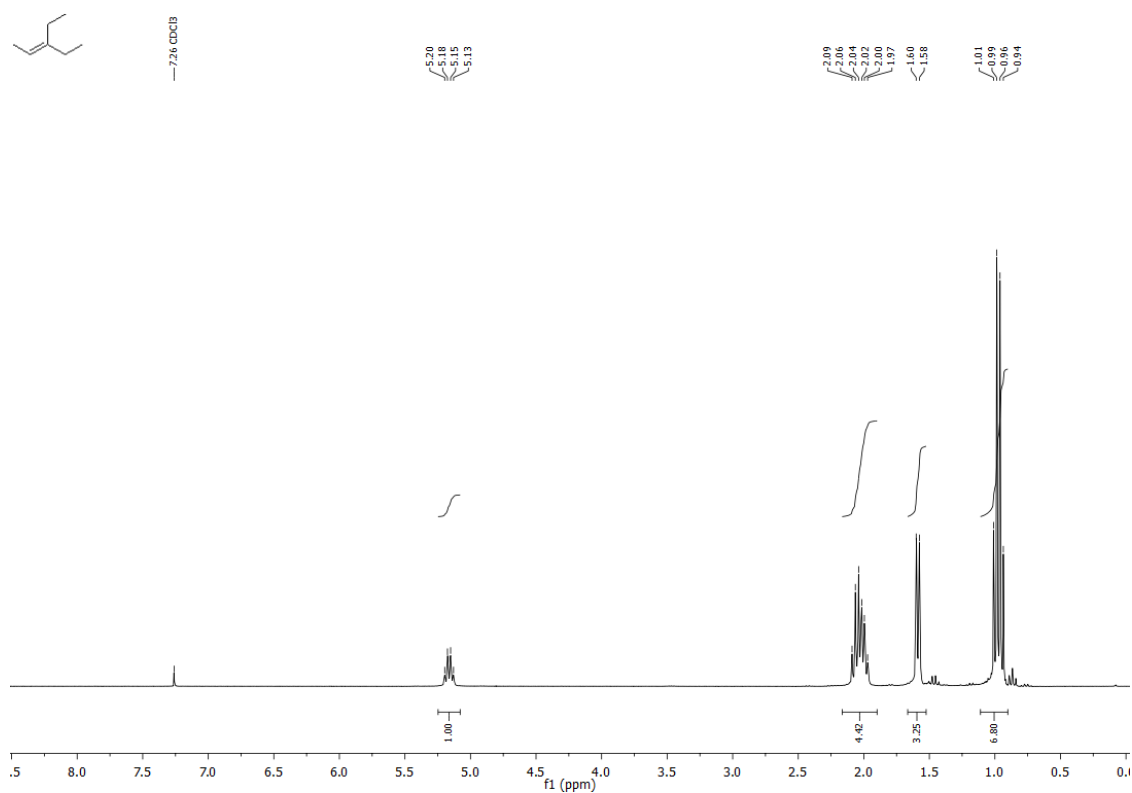

**Figure S9:** <sup>1</sup>H NMR (300 MHz, CDCl<sub>3</sub>) spectrum of 3-ethyl-pent-2-ene.

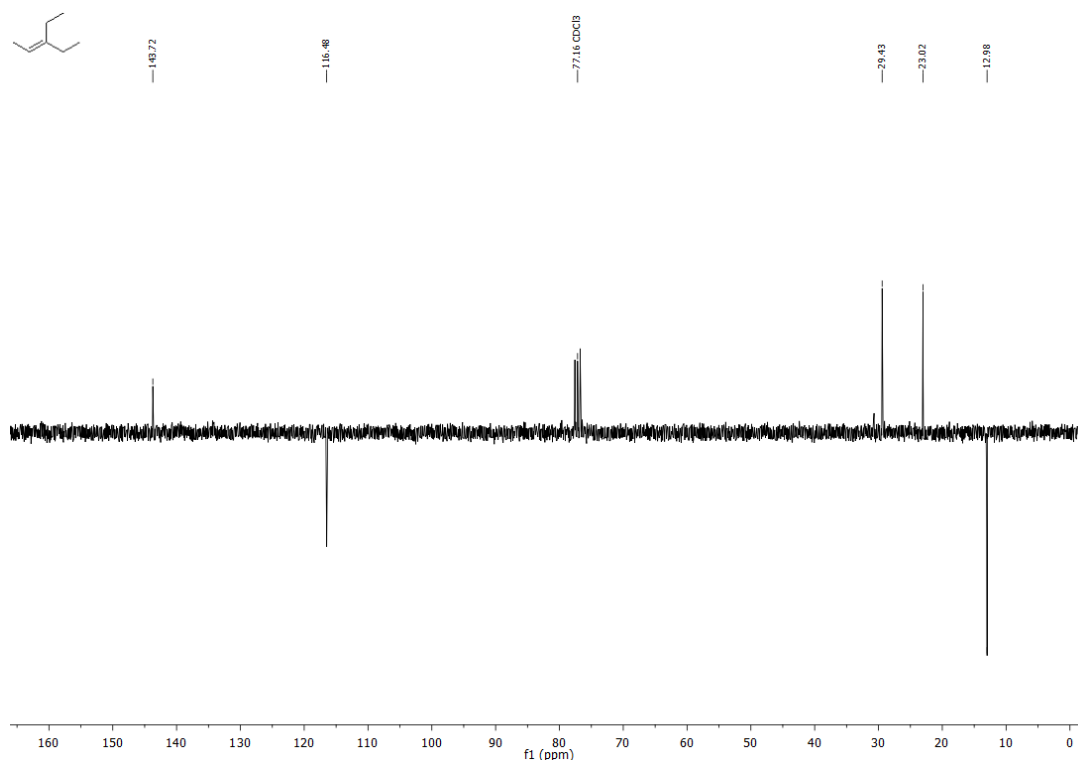

**Figure S10:**  $^{13}\text{C}$  NMR (75 MHz,  $\text{CDCl}_3$ ) spectrum of 3-ethyl-pent-2-ene.

### Synthesis of olefins from menthol

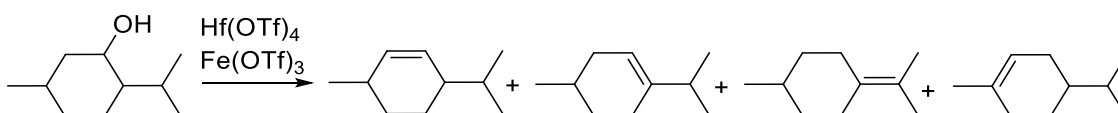

12.8 mmol (2 g) of DL-menthol (98+%, Alfa Aesar) and 0.5 mol% of  $\text{Hf}(\text{OTf})_4$  (98%, Alfa Aesar) or  $\text{Fe}(\text{OTf})_3$  (90% Tech., Alfa Aesar) were placed into a 5 ml round bottom flask. The flask was connected to micro distillation apparatus. The reaction mixture was heated at 150 °C for 3 hours with  $\text{Hf}(\text{OTf})_4$  as a catalyst (165 °C, 4 h with  $\text{Fe}(\text{OTf})_3$ ) under reduced pressure (178 mmHg). The formed olefins were distilled (98-115 °C) and collected to cooled (0 °C) flask to avoid evaporation of the product. The product containing flask was cooled in freezer (-20 °C) to separate the evaporated water (side product of the reaction) from the products. The products, 1-isopropyl-4-methylcyclohex-1-ene, 1-methyl-4-(propan-2-ylidene)cyclohexane, 3-isopropyl-6-methylcyclohex-1-ene and 4-isopropyl-1-methylcyclohex-1-ene, were analyzed with GC-MS,  $^1\text{H}$  and  $^{13}\text{C}$  NMR (Figures S11 & S12). The olefin products were obtained in 82% ( $\text{Hf}(\text{OTf})_4$ ) and 71% ( $\text{Fe}(\text{OTf})_3$ ) yields.

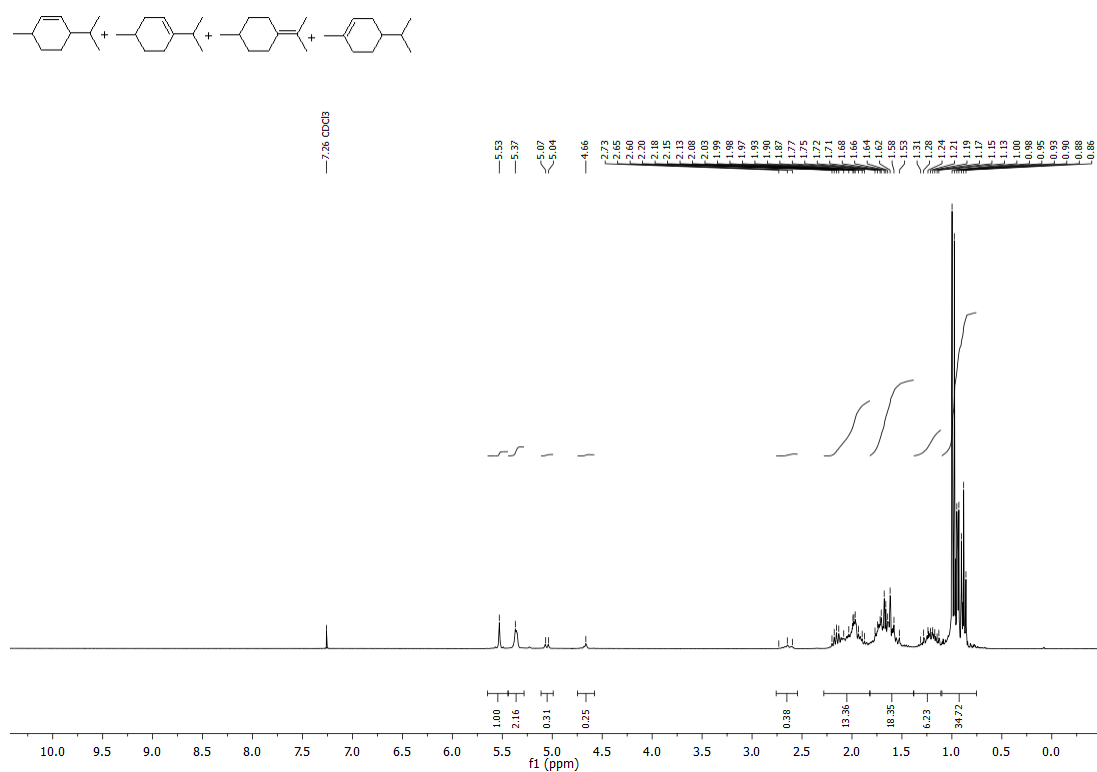

**Figure S11:**  $^1\text{H NMR}$  (300 MHz,  $\text{CDCl}_3$ ) spectrum of mixture of 1-isopropyl-4-methylcyclohex-1-ene, 1-methyl-4-(propan-2-ylidene)cyclohexane, 3-isopropyl-6-methylcyclohex-1-ene and 4-isopropyl-1-methylcyclohex-1-ene.

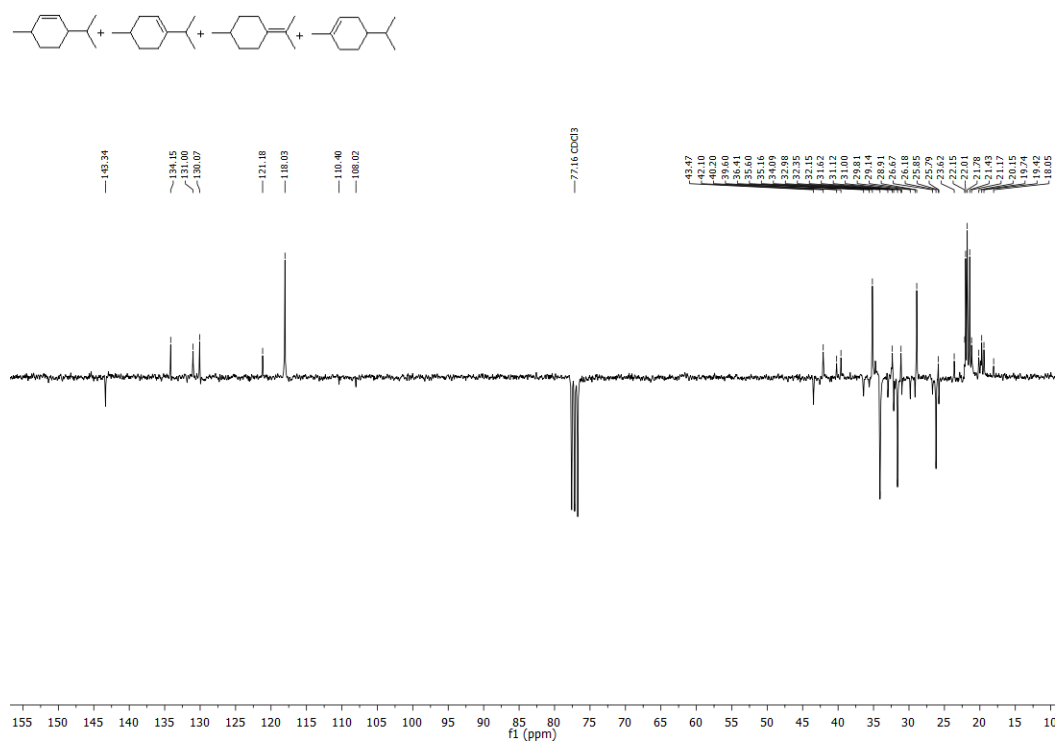

**Figure S12:**  $^{13}\text{C NMR}$  (75 MHz,  $\text{CDCl}_3$ ) spectrum of mixture of 1-isopropyl-4-methylcyclohex-1-ene, 1-methyl-4-(propan-2-ylidene)cyclohexane, 3-isopropyl-6-methylcyclohex-1-ene and 4-isopropyl-1-methylcyclohex-1-ene.

## Synthesis of 1,4-dioxane from diethylene glycol

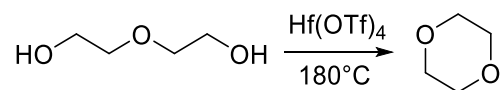

12.8 mmol of diethylene glycol ( $\geq 99.0\%$ , Sigma Aldrich) and 0.5 mol% of  $\text{Hf}(\text{OTf})_4$  (98%, Alfa Aesar) were placed into a 5 ml round bottom flask. The flask was connected to micro distillation apparatus. The reaction mixture was heated at  $180^\circ\text{C}$  for 4.5 hours (as long as substrate was left in the heated flask). The formed 1,4-dioxane was distilled ( $85\text{-}93^\circ\text{C}$ ) and collected to cooled ( $0^\circ\text{C}$ ) flask to avoid evaporation of the product. The product was dried from water using molecular sieves ( $4\text{ \AA}$ ). The liquid solution was collected and the chloroform was evaporated using rotary evaporator. The product, 1,4-dioxane, was analyzed with  $^1\text{H}$  and  $^{13}\text{C}$  NMR (Figures S13 & S14). The yield of 1,4-dioxane was 85%.

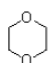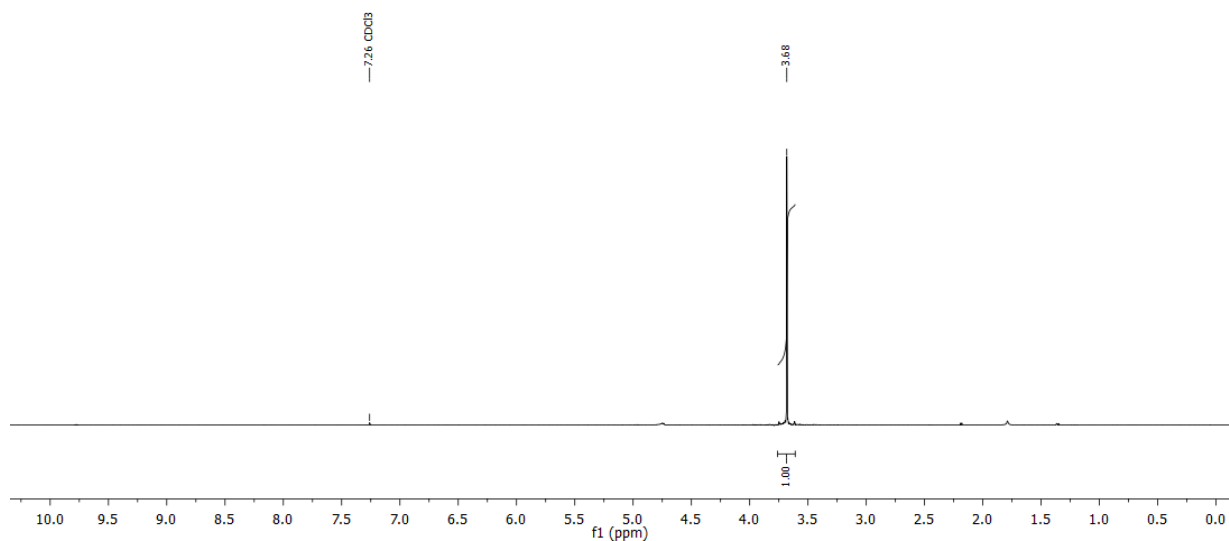

**Figure S13:**  $^1\text{H}$  NMR (300 MHz,  $\text{CDCl}_3$ ) spectrum of 1,4-dioxane.

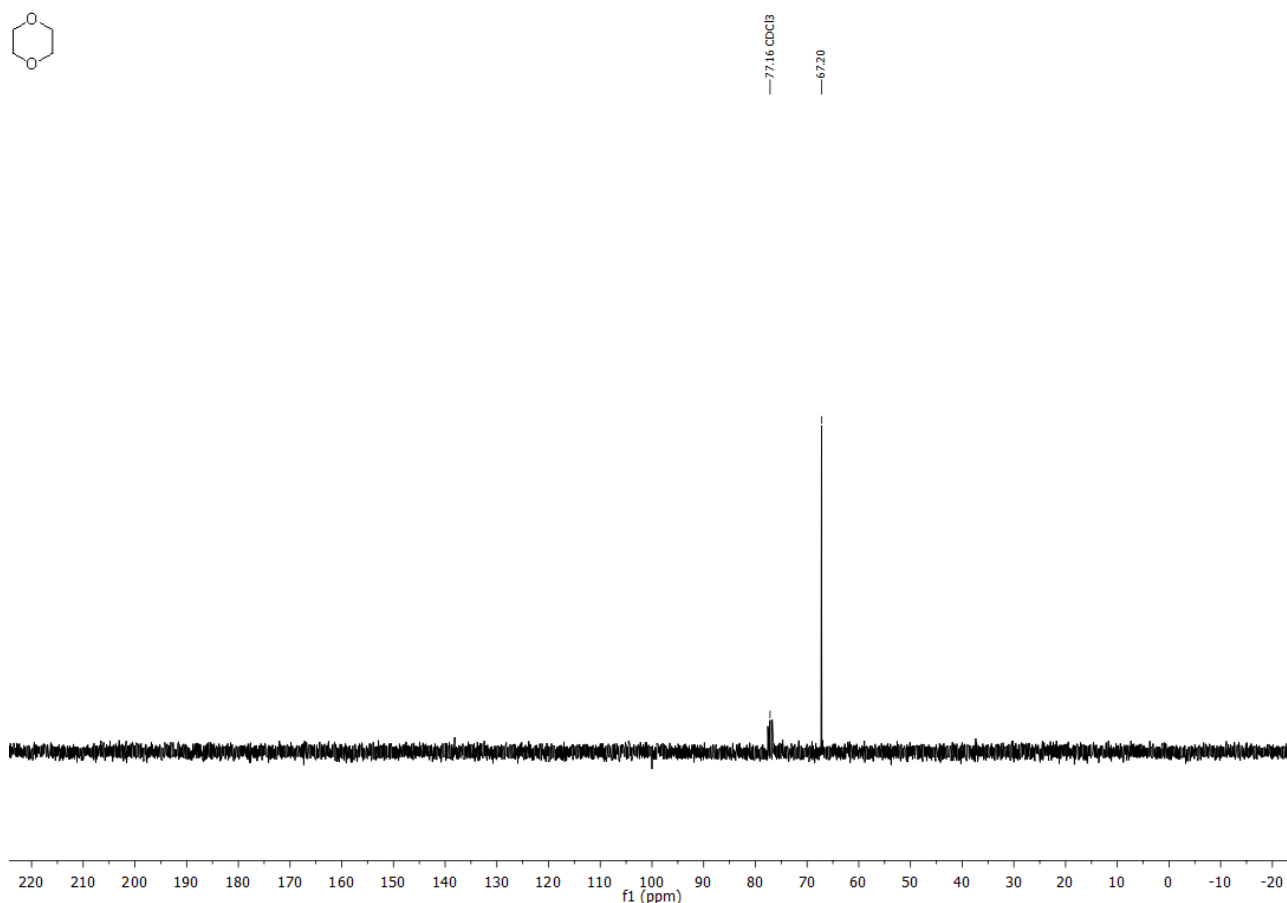

**Figure S14:**  $^{13}\text{C}$  NMR (75 MHz,  $\text{CDCl}_3$ ) spectrum of 1,4-dioxane

### Synthesis of olefins from $\alpha$ -terpineol

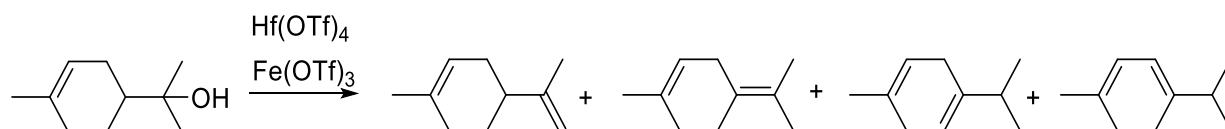

13.0 mmol of  $\alpha$ -terpineol (96.0%, Alfa Aesar) and 0.5 mol% of  $\text{Hf}(\text{OTf})_4$  (98%, Alfa Aesar) or  $\text{Fe}(\text{OTf})_3$  (90% Tech., Alfa Aesar) were placed into a 5 ml round bottom flask. The flask was connected to micro distillation apparatus. The reaction mixture was heated at 110 °C for 0.5 hours with  $\text{Hf}(\text{OTf})_4$  as a catalyst under reduced pressure of 55 mmHg (130 °C, 0.5 h, 63 mmHg with  $\text{Fe}(\text{OTf})_3$ ). The formed olefins were distilled at 92 °C (with  $\text{Fe}(\text{OTf})_3$  99 °C) and collected to cooled (0 °C) flask to avoid evaporation of the product. The product containing flask was cooled in freezer (-20 °C) to separate the evaporated water (side product of the reaction) from the products. The products, limonene,  $\alpha$ -terpinen,  $\gamma$ -terpinene and  $\alpha$ -terpinolene, were analyzed with GC-MS,  $^1\text{H}$  and  $^{13}\text{C}$  NMR (Figures S15 & S16). Also trace amounts of cymene and eucalyptol were detected from the distilled products. The olefin products were obtained in 16% ( $\text{Hf}(\text{OTf})_4$ ) and 76% ( $\text{Fe}(\text{OTf})_3$ ) yields and in the ratio of 50:38:7:7 (limonene: $\alpha$ -terpinolene: $\alpha$ -terpinen: $\gamma$ -terpinene).

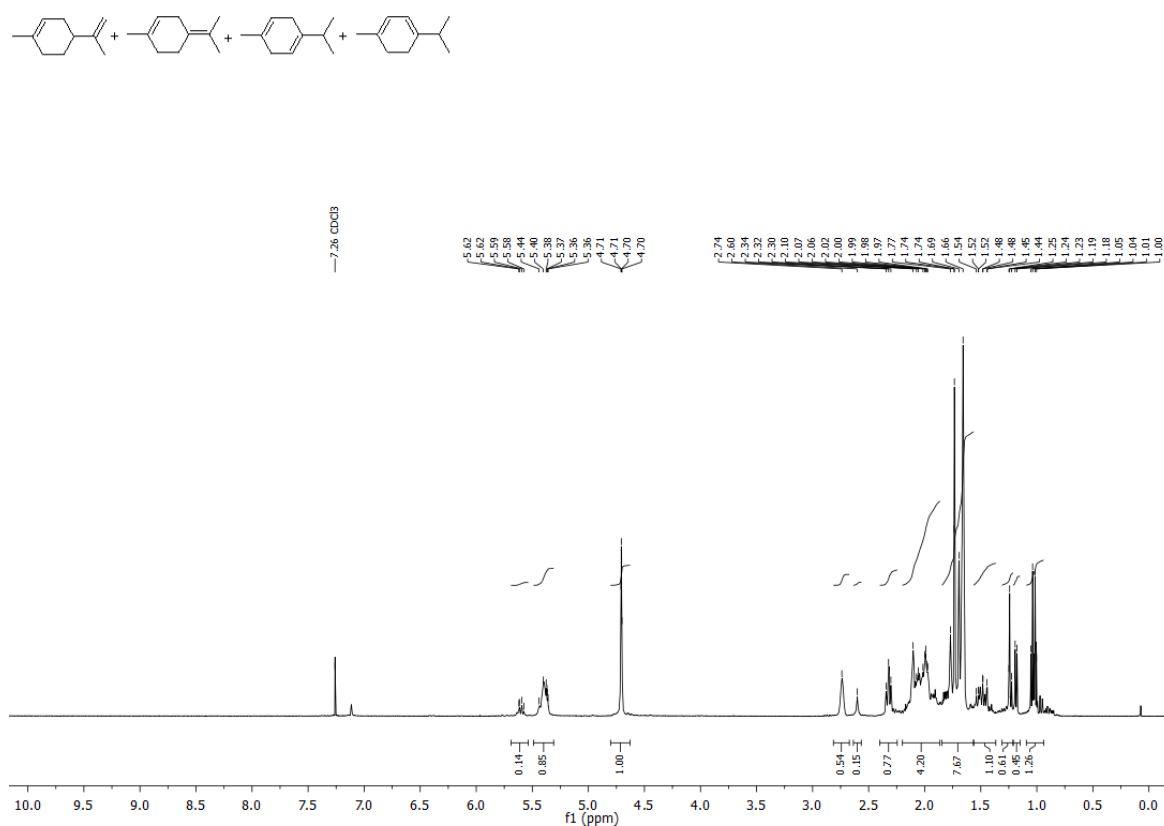

**Figure S15:**  $^1\text{H NMR}$  (300 MHz,  $\text{CDCl}_3$ ) spectrum of mixture of limonene,  $\alpha$ -terpinen,  $\gamma$ -terpinene and  $\alpha$ -terpinolene

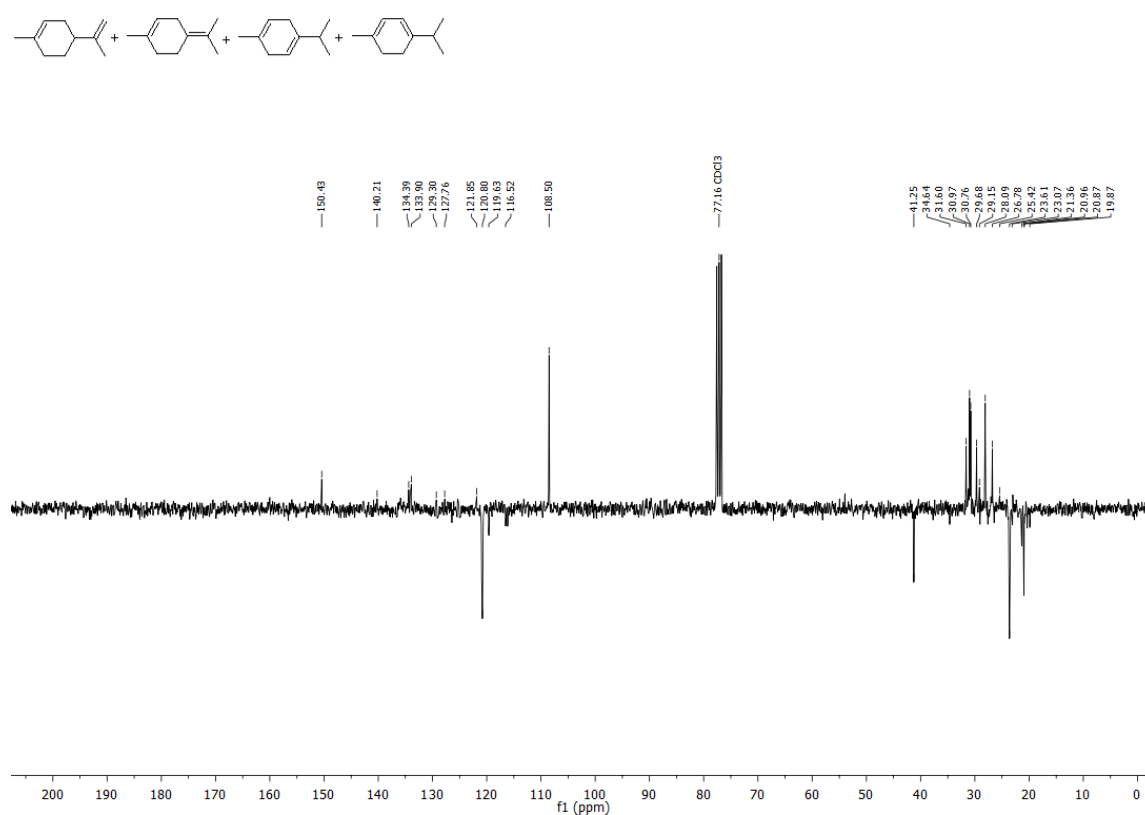

**Figure S16:**  $^{13}\text{C NMR}$  (75 MHz,  $\text{CDCl}_3$ ) spectrum of mixture of limonene,  $\alpha$ -terpinen,  $\gamma$ -terpinene and  $\alpha$ -terpinolene

### Synthesis of olefins from $\beta$ -citronellol

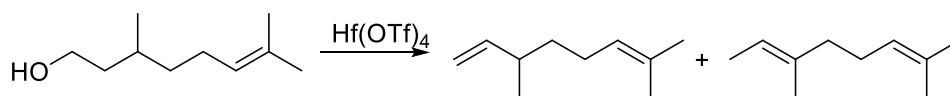

18.6 mmol of  $\beta$ -citronellol (95%, Sigma Aldrich) and 0.5 mol% of  $\text{Hf}(\text{OTf})_4$  (98%, Alfa Aesar) were placed into a 5 ml round bottom flask. The flask was connected to micro distillation apparatus. The reaction mixture was heated at 180 °C for 24 hours. The formed olefins were distilled very slowly and collected to cooled (0 °C) flask to avoid evaporation of the product (distillation temperature could not be measured due to slow evaporation, vapor temperature was constant at 60 °C). The product containing flask was cooled in freezer (-20 °C) to separate the evaporated water (side product of the reaction) from the products. The products were analyzed with GC-MS,  $^1\text{H}$  and  $^{13}\text{C}$  NMR. The olefins were obtained in 7% yield, however the mixture was so complex that the composition and the ratio could not be identified. Only the depicted product structures were recognized with GC-MS.

### Synthesis of olefins from dihydromyrcenol

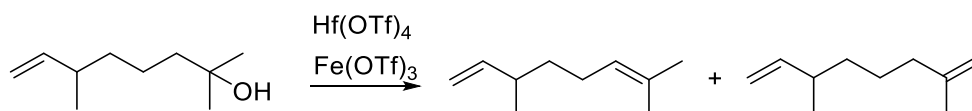

10.7 mmol of dihydromyrcenol (99%, Sigma Aldrich) and 0.5 mol% of  $\text{Hf}(\text{OTf})_4$  (98%, Alfa Aesar) or  $\text{Fe}(\text{OTf})_3$  (90% Tech., Alfa Aesar) were placed into a 5 ml round bottom flask. The flask was connected to micro distillation apparatus. The reaction mixture was heated at 110 °C for 0.5 hours with  $\text{Hf}(\text{OTf})_4$  as a catalyst under reduced pressure of 82 mmHg (130 °C, 0.5 h, 160 mmHg with  $\text{Fe}(\text{OTf})_3$ ). The formed olefins were distilled at 83-88 °C (with  $\text{Fe}(\text{OTf})_3$  92 °C) and collected to cooled (0 °C) flask to avoid evaporation of the product. The product containing flask was cooled in freezer (-20 °C) to separate the evaporated water (side product of the reaction) from the products. The products, 3,7-dimethylocta-1,6-diene and 2,6-dimethylocta-1,7-diene formed in the ratio of 2:1, were analyzed with GC-MS,  $^1\text{H}$  and  $^{13}\text{C}$  NMR (Figures S17 & S18). The olefin products were obtained in 84% ( $\text{Hf}(\text{OTf})_4$ ) and 82% ( $\text{Fe}(\text{OTf})_3$ ) yields.

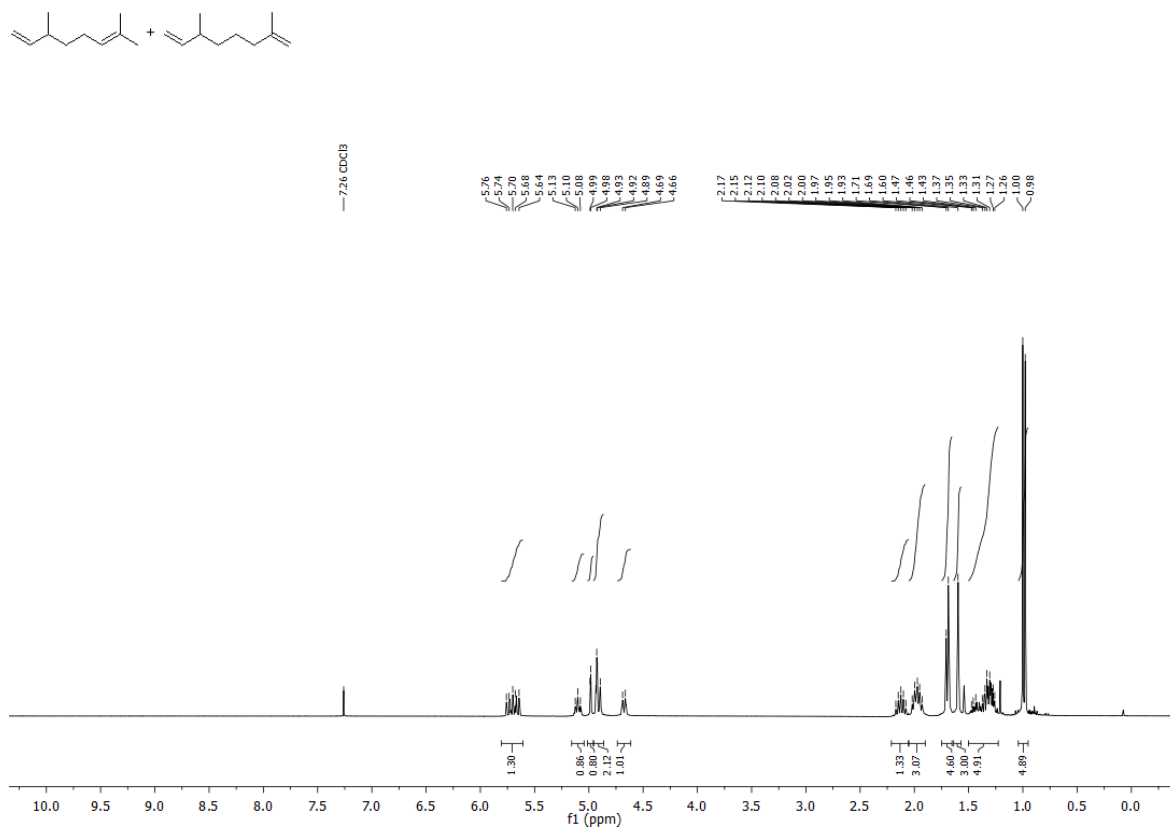

**Figure S17:** <sup>1</sup>H NMR (300 MHz, CDCl<sub>3</sub>) spectrum of mixture of 3,7-dimethylocta-1,6-diene and 2,6-dimethylocta-1,7-diene.

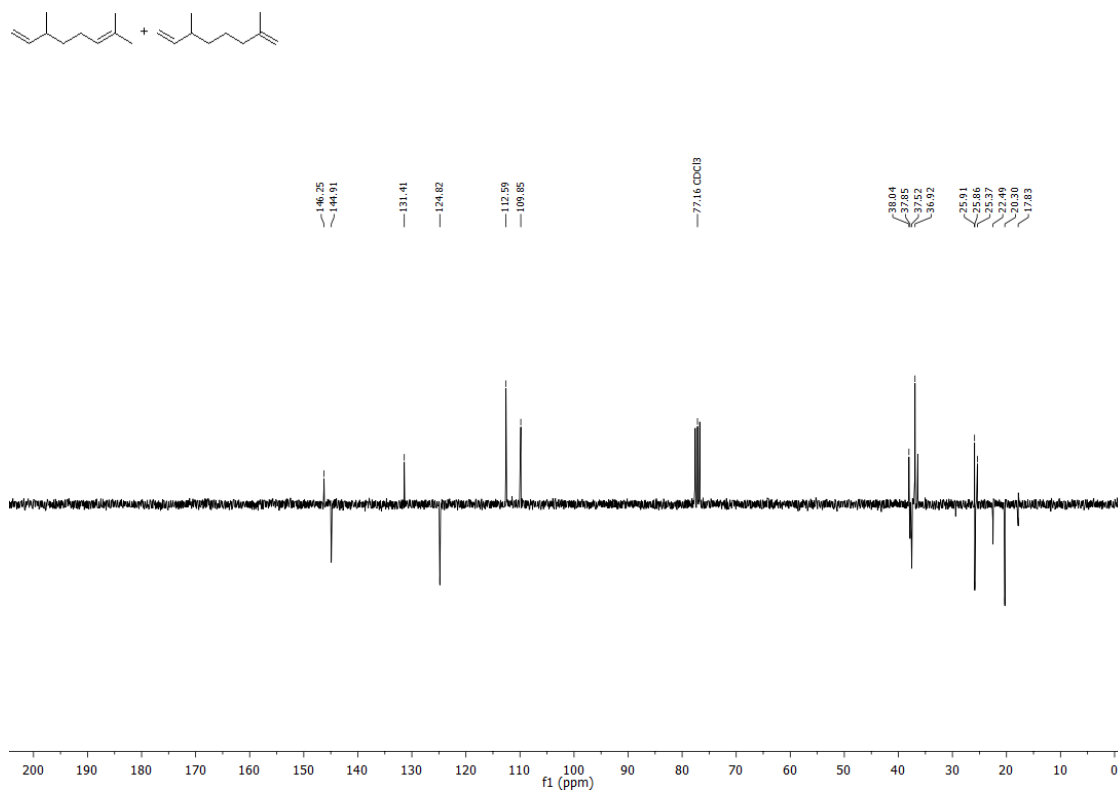

**Figure S18:** <sup>13</sup>C NMR (75 MHz, CDCl<sub>3</sub>) spectrum of mixture of 3,7-dimethylocta-1,6-diene and 2,6-dimethylocta-1,7-diene.



## Synthesis of olefins from linalool

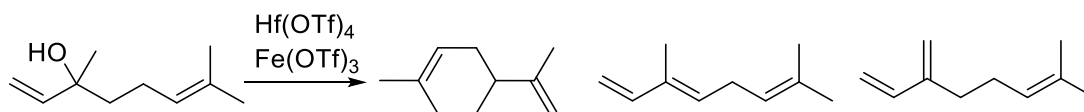

11.3 mmol of linalool (97%, Alfa Aesar) and 0.5 mol% of  $\text{Hf}(\text{OTf})_4$  (98%, Alfa Aesar) or  $\text{Fe}(\text{OTf})_3$  (90% Tech., Alfa Aesar) were placed into a 5 ml round bottom flask. The flask was connected to micro distillation apparatus. The reaction mixture was heated at 110 °C for 0.5 hours with  $\text{Hf}(\text{OTf})_4$  as a catalyst under reduced pressure of 60 mmHg (110 °C, 0.5 h, 62 mmHg with  $\text{Fe}(\text{OTf})_3$ ). The formed olefins were distilled at 84 °C (with  $\text{Fe}(\text{OTf})_3$  85 °C) and collected to cooled (0 °C) flask to avoid evaporation of the product. The product containing flask was cooled in freezer (-20 °C) to separate the evaporated water (side product of the reaction) from the products. The products, 1-methyl-4-(1-methylethenyl)-cyclohexene, 3,7-dimethyl-1,3,6-octatriene, 7-methyl-3-methylene-1,6-octadiene, were analyzed with GC-MS,  $^1\text{H}$  and  $^{13}\text{C}$  NMR (Figures S19 & S20). The olefin products were obtained in 3% ( $\text{Hf}(\text{OTf})_4$ ) and 3% ( $\text{Fe}(\text{OTf})_3$ ) yields.

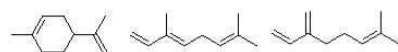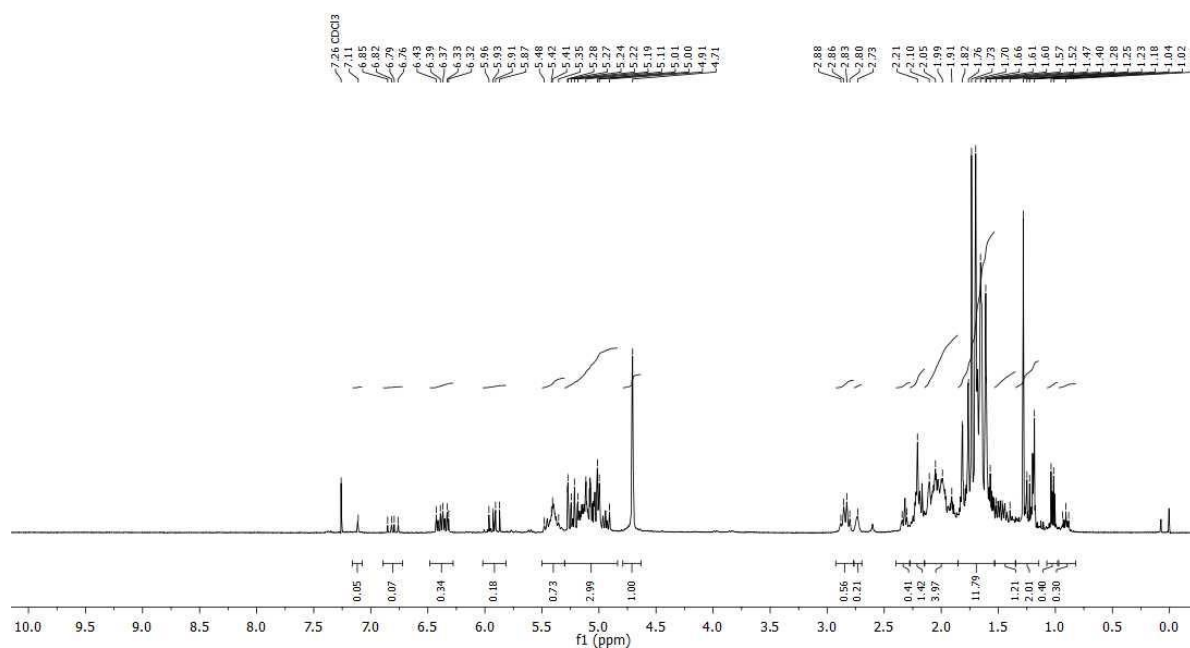

**Figure S19:**  $^1\text{H}$  NMR (300 MHz,  $\text{CDCl}_3$ ) spectrum of mixture of 1-methyl-4-(1-methylethenyl)-cyclohexene, 3,7-dimethyl-1,3,6-octatriene, 7-methyl-3-methylene-1,6-octadiene.

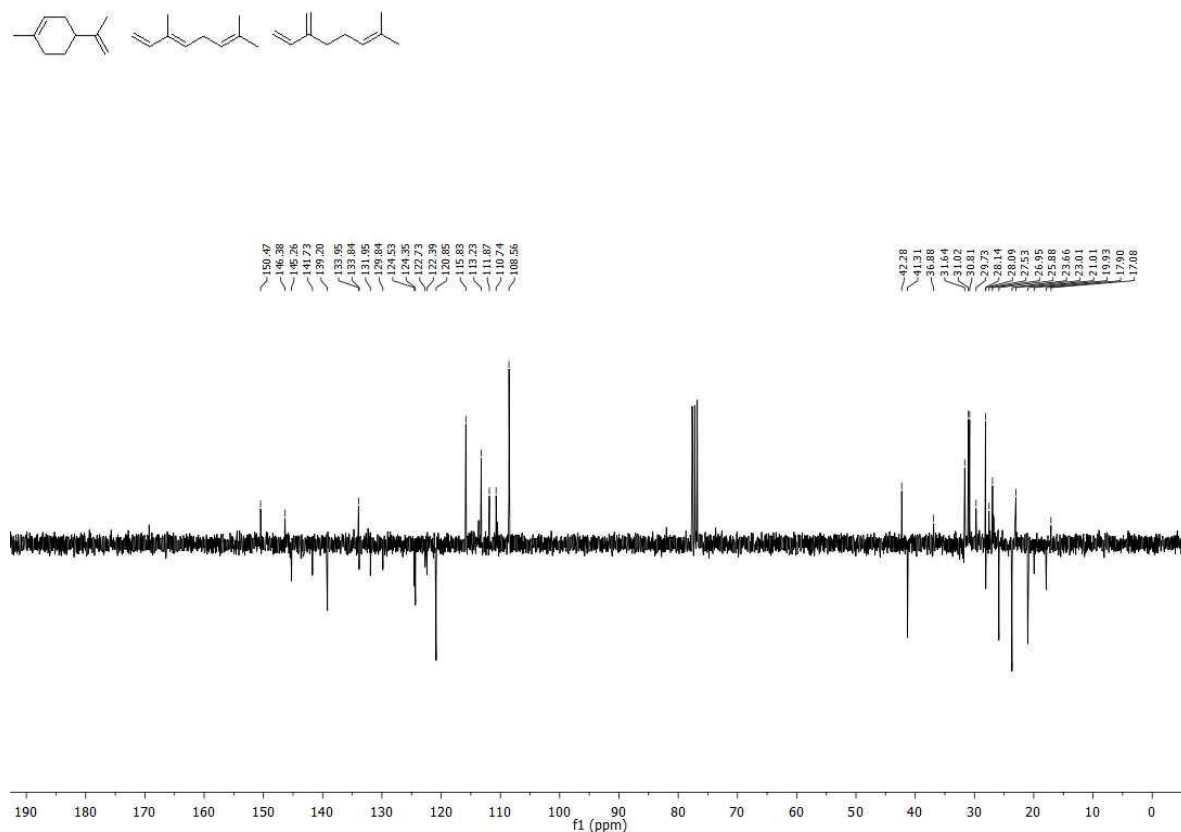

**Figure S20:** <sup>13</sup>C NMR (75 MHz, CDCl<sub>3</sub>) spectrum of mixture of 1-methyl-4-(1-methylethenyl)cyclohexene, 3,7-dimethyl-1,3,6-octatriene, 7-methyl-3-methylene-1,6-octadiene.

### Synthesis of 1-phenylpropene from 1-phenyl-1-propanol

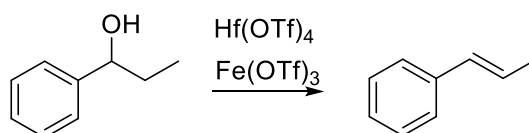

22.3 mmol of (±)-1-phenyl-1-propanol (≥97%, Fluka) and 0.5 mol% of Hf(OTf)<sub>4</sub> (98%, Alfa Aesar) or Fe(OTf)<sub>3</sub> (90% Tech., Alfa Aesar) were placed into a 5 ml round bottom flask. The flask was connected to micro distillation apparatus. The reaction mixture was heated at 110 °C for 0.5 hours with Hf(OTf)<sub>4</sub> as a catalyst under reduced pressure of 76 mmHg (130 °C, 0.5 h, 75 mmHg with Fe(OTf)<sub>3</sub>). The formed 1-phenylpropene was distilled at 98 °C (with Fe(OTf)<sub>3</sub> 101 °C) and collected to cooled (0 °C) flask to avoid evaporation of the product. The product containing flask was cooled in freezer (-20 °C) to separate the evaporated water (side product of the reaction) from the products. The product 1-phenylpropene was analyzed with GC-MS, <sup>1</sup>H and <sup>13</sup>C NMR (Figures S21 & S22). The olefin products were obtained in 3% (Hf(OTf)<sub>4</sub>) and 3% (Fe(OTf)<sub>3</sub>) yields.

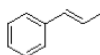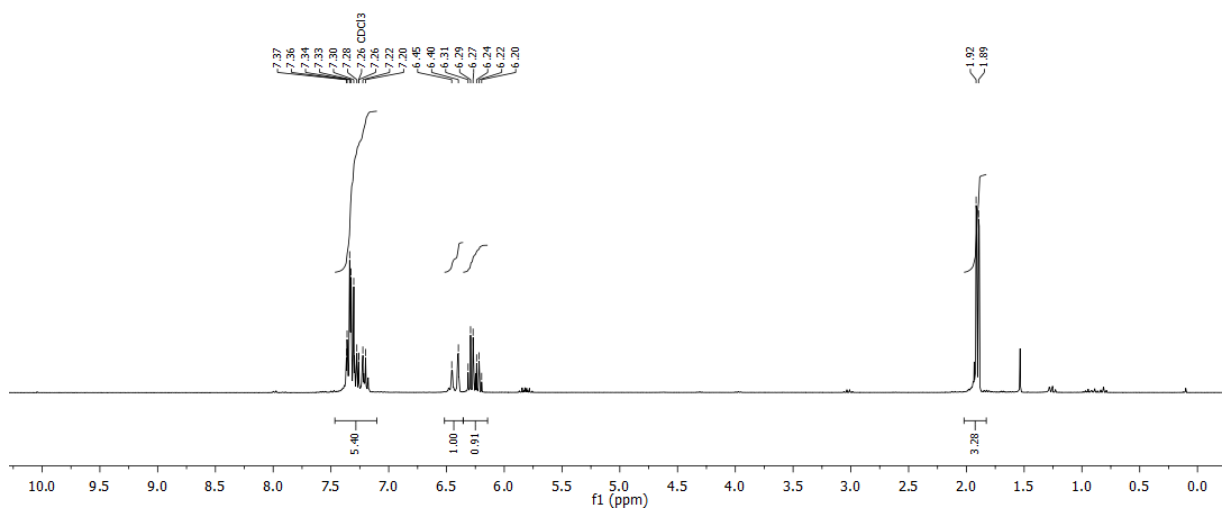

Figure S21:  $^1\text{H}$  NMR (300 MHz,  $\text{CDCl}_3$ ) spectrum of 1-phenylpropene.

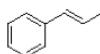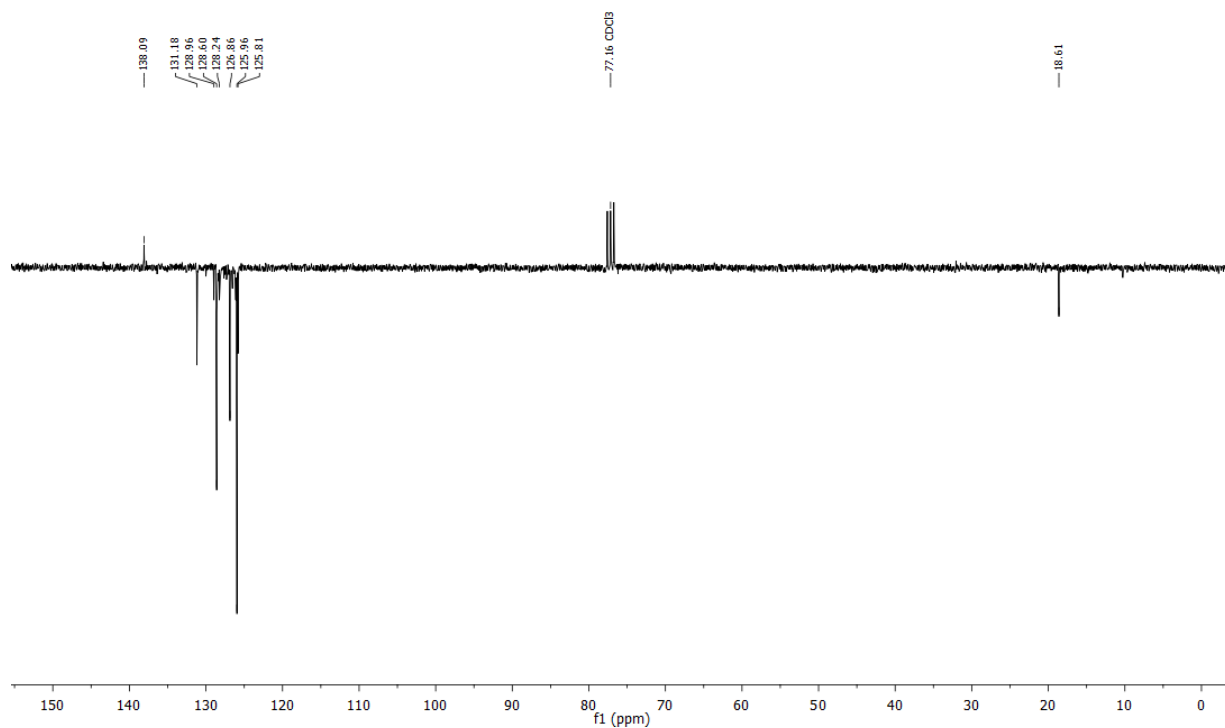

Figure S22:  $^{13}\text{C}$  NMR (75 MHz,  $\text{CDCl}_3$ ) spectrum of 1-phenylpropene.

## Alkene synthesis from ethers and esters

**Table S2:** Conversion of ethers and esters to alkenes using metal triflate (0.5 mol% loading) catalysts.

| Entry | Catalyst             | Substrate (mmol)     | Water (mmol) | Time (h) | Temperature (°C) | Octene yield (%) | Yield of others |
|-------|----------------------|----------------------|--------------|----------|------------------|------------------|-----------------|
| 1     | Fe(OTf) <sub>3</sub> | dioctyl-ether (3.3)  | -            | 24       | 180              | -                | 3% 1-octanol    |
| 2     | Fe(OTf) <sub>3</sub> | dioctyl-ether (3.3)  | 3.3          | 24       | 180              | 1                | 5% 1-octanol    |
| 3     | Fe(OTf) <sub>3</sub> | octyl acetate (5.0)  | -            | 3        | 170              | 4                | -               |
| 4     | Fe(OTf) <sub>3</sub> | octyl acetate (5.0)  | 5.0          | 3        | 170              | 4                | 12% 1-octanol   |
| 5     | Fe(OTf) <sub>3</sub> | octyl acetate (10.1) | -            | 36       | 180              | 68               | -               |
| 6     | Hf(OTf) <sub>4</sub> | dioctyl-ether (3.3)  | -            | 8        | 180              | -                | -               |
| 7     | Hf(OTf) <sub>4</sub> | dioctyl-ether (3.3)  | 3.3          | 8        | 180              | 7                | 1% 1-octanol    |
| 8     | Hf(OTf) <sub>4</sub> | dioctyl-ether (3.3)  | 6.6          | 8        | 180              | 5                | -               |
| 9     | Hf(OTf) <sub>4</sub> | dioctyl-ether (3.3)  | 3.3          | 24       | 180              | 29               | 2% 1-octanol    |
| 10    | Hf(OTf) <sub>4</sub> | octyl acetate (5.0)  | -            | 3        | 150              | 13               | -               |
| 11    | Hf(OTf) <sub>4</sub> | octyl acetate (5.0)  | 5.0          | 3        | 150              | 2                | 13% 1-octanol   |
| 12    | Hf(OTf) <sub>4</sub> | octyl acetate (5.0)  | -            | 3        | 170              | 20               | -               |
| 13    | Hf(OTf) <sub>4</sub> | octyl acetate (5.0)  | 5.0          | 3        | 170              | 5                | 17% 1-octanol   |
| 14    | Hf(OTf) <sub>4</sub> | octyl acetate (10.1) | -            | 22       | 180              | 80               | -               |

### Synthesis of octenes from octyl acetate

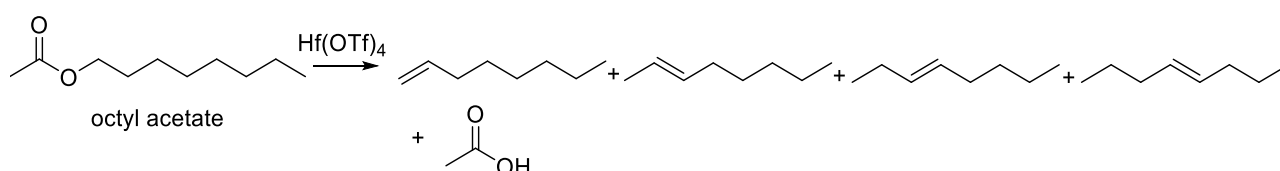

10.1 mmol of octyl acetate ( $\geq 97\%$ , Fluka) and 0.5 mol% of Hf(OTf)<sub>4</sub> (98%, Alfa Aesar) or Fe(OTf)<sub>3</sub> (90% Tech., Alfa Aesar) were placed into a 5 ml round bottom flask. The flask was connected to micro distillation apparatus. The reaction mixture was heated at 180 °C for 24 hours (Hf(OTf)<sub>4</sub>) and 36 hours (Fe(OTf)<sub>3</sub>). The formed octenes and acetic acid were distilled at ~120 °C and collected to

cooled (0 °C) flask to avoid evaporation of the product. The mixture of products was washed with 2 M NaOH solution to separate the acetic acid from octenes. The octenes were isolated by separating the two phases. The octenes were analyzed with GC-MS,  $^1\text{H}$  and  $^{13}\text{C}$  NMR. Octenes were obtained in 80% ( $\text{Hf}(\text{OTf})_4$ ) and 68% ( $\text{Fe}(\text{OTf})_3$ ), with (2-, 3-, 4-octene:1-octene) ratio of 13:1.

### $^1\text{H}$ NMR of the oligomerized product

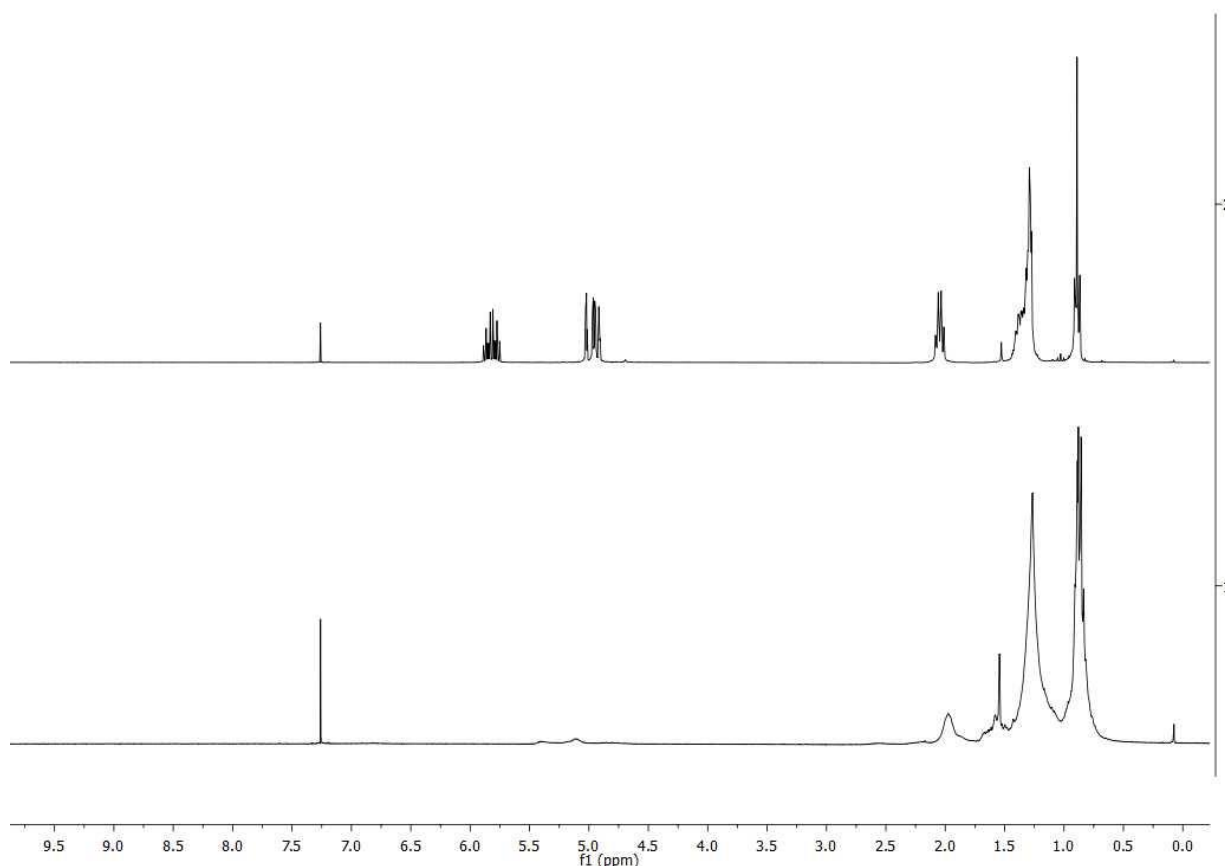

**Figure S23:**  $^1\text{H}$  NMR (300 MHz,  $\text{CDCl}_3$ ) spectra of the polymerized/oligomerized 1-octene with  $\text{Hf}(\text{OTf})_4$  (1) and without  $\text{Hf}(\text{OTf})_4$  (2).

### Synthesis of isosorbide from sorbitol

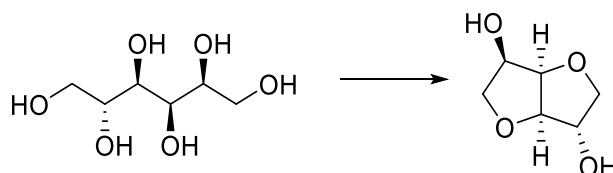

2.7 mmol of sorbitol (>98%, Sigma Aldrich) and 0.5 mol% of  $\text{Hf}(\text{OTf})_4$  (98%, Alfa Aesar) or  $\text{Fe}(\text{OTf})_3$  (90% Tech., Alfa Aesar) were placed into a flask. The reaction mixtures were heated at 130 °C for 3 hours ( $\text{Hf}(\text{OTf})_4$ ) and 150 °C 3 hours ( $\text{Fe}(\text{OTf})_3$ ) *in vacuo* to help remove the forming water. After heating, the reaction mixtures were dissolved in milli-q water and analyzed with HPLC-FID. Isosorbide was generated in 78% ( $\text{Hf}(\text{OTf})_4$ ) and 77% ( $\text{Fe}(\text{OTf})_3$ ) yields. The yields were calculated using internal standard and calibration curves.

### Synthesis of octenes from octanoic acid

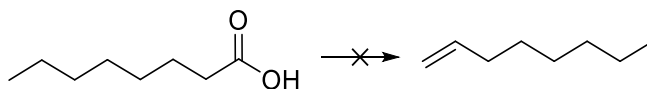

6.3 mmol of octanoic acid ( $\geq 99\%$ , Sigma Aldrich) and 0.5 mol% of  $\text{Hf}(\text{OTf})_4$  (98%, Alfa Aesar) or  $\text{Fe}(\text{OTf})_3$  (90% Tech., Alfa Aesar) were placed into a vial. The vial was capped and the reaction mixtures were heated at 180 °C for 6 hours. According to GC-MS no conversion of octanoic acid was detected.

### Synthesis of octenes from octanal

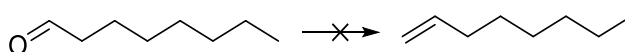

3.2 mmol of octanal (99%, Sigma Aldrich) and 0.5 mol% of  $\text{Hf}(\text{OTf})_4$  (98%, Alfa Aesar) or  $\text{Fe}(\text{OTf})_3$  (90% Tech., Alfa Aesar) were placed into a vial. The vial was capped and the reaction mixtures were heated at 180 °C for 1 hour. The reaction mixture turned dark brown very rapidly, and the analysis conducted with GC-MS indicated that the octanal underwent oligomerization with almost quantitative conversion. No octenes were detected from the solution.

### Synthesis of olefins from dimethyl tetrahydrofuran

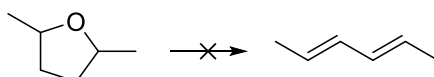

4.2 mmol of dimethyl tetrahydrofuran (96% mixture of *cis* and *trans*, Sigma Aldrich), 1 mol-eq of  $\text{H}_2\text{O}$  and 0.5 mol% of  $\text{Hf}(\text{OTf})_4$  (98%, Alfa Aesar) or  $\text{Fe}(\text{OTf})_3$  (90% Tech., Alfa Aesar) were placed into a vial. The vial was capped and the reaction mixtures were heated at 180 °C for 6 hours. According to  $^1\text{H}$  &  $^{13}\text{C}$  NMR analysis no conversion of dimethyl tetrahydrofuran occurred during the heating.

## References

- 1 R. D. Shannon, *Acta Crystallogr. Sect. A*, 1976, **32**, 751–767.
- 2 J. A. Dean, *Lange's Handbook of chemistry*, 1985.
- 3 I. Hachiya, M. Moriwaki and S. Kobayashi, *Tetrahedron Lett.*, 1995, **36**, 409–412.
